# Supplementary material for: New small-molecule alcohol synthesis by breaking the space limitation of the “aromatic cage” in Pseudomonas sp. AK1 BBOX
Source: Royal Society of Chemistry journal article supplement (doi:10.1039/d3ob00830d), 2023-01-01
Supplement: d3ob00830d1.pdf [file d3ob00830d1.pdf]

## Supporting Information

**New Small-Molecule Alcohol Synthesis by Breaking the Space**

**Limitation of “Aromatic Cage” in *Pseudomonas* sp. AK1 BBOX**

Zhiqin Xu<sup>a</sup>, Yaling Mo<sup>a</sup>, Zhengwen Li<sup>a</sup>, Shurong Ban<sup>a\*</sup>, Heng song<sup>b,c\*</sup>.

<sup>a</sup>School of Pharmacy, Shanxi Medical University, Taiyuan, Shanxi Province 030001, China

<sup>b</sup>College of Chemistry & Molecular Science, Wuhan University, Wuhan, Hubei Province 430072, China

<sup>c</sup>Wuhan University Shenzhen Research Institute, Shenzhen, Guangdong Province 518000, China

\*Email: [hengsong@whu.edu.cn](mailto:hengsong@whu.edu.cn); [shurongban@sxmu.edu.cn](mailto:shurongban@sxmu.edu.cn)

## Contents

|                                                                    |    |
|--------------------------------------------------------------------|----|
| SDS-PAGE analysis of WT-psBBOX.....                                | 2  |
| Sequence alignment <sup>1</sup> .....                              | 3  |
| Homology modelling.....                                            | 4  |
| Molecular docking.....                                             | 5  |
| Construction of psBBOX mutants.....                                | 6  |
| SDS-PAGE analysis of mutants.....                                  | 7  |
| Analysis of psBBOX-188A activity.....                              | 7  |
| kinetic analysis.....                                              | 8  |
| Synthesis of $\gamma$ -BB analogues.....                           | 10 |
| Stereoselective synthesis of two configurations of 4a, 7a, 8a..... | 11 |
| NMR spectra.....                                                   | 12 |
| References.....                                                    | 28 |

**SDS-PAGE analysis of WT-psBBOX**

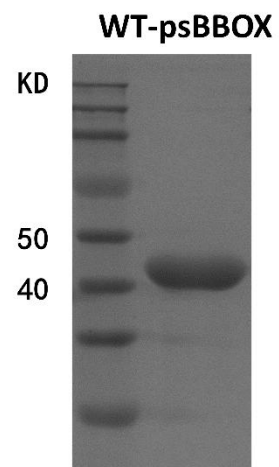

**Figure S1** SDS-PAGE analysis of the WT-psBBOX (45.3 KD).

## Sequence alignment<sup>1</sup>

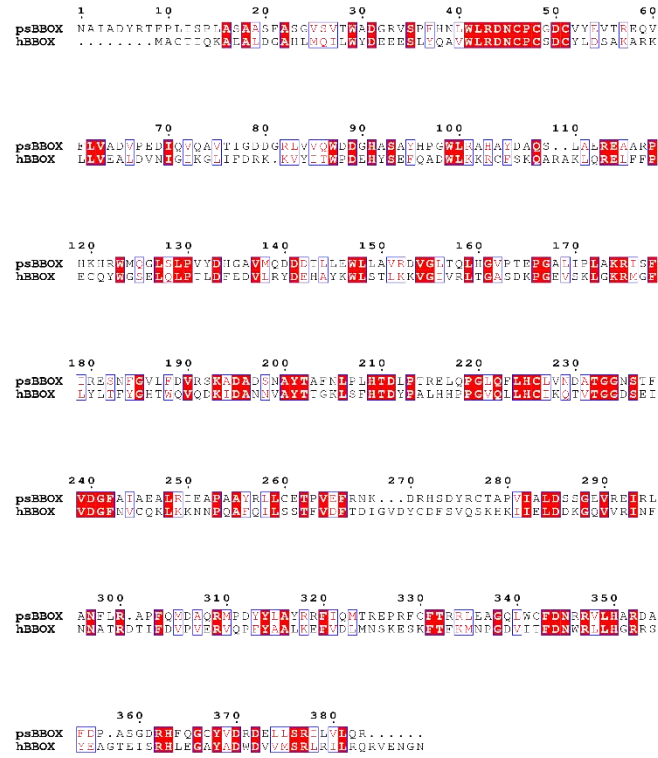

**Figure S2** Sequence alignment of *Pseudomonas* sp. AK1 BBOX (psBBOX gi|231642) and human BBOX (hbBBOX gi|158261239).

## Homology modelling

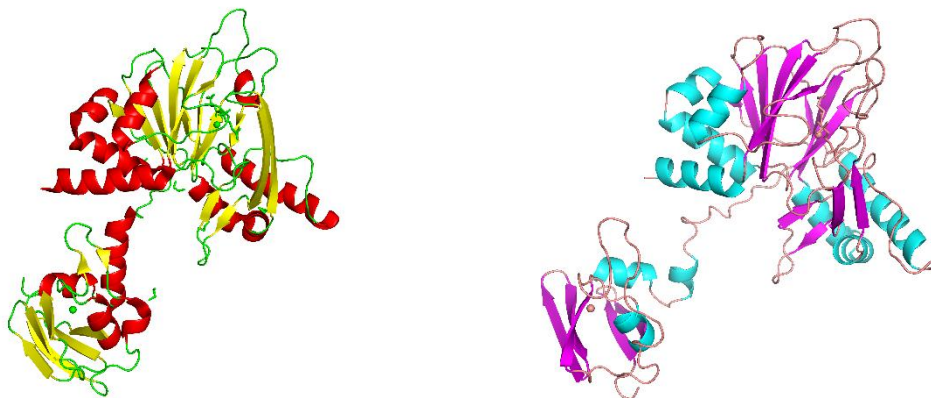

**Figure S3** hBBOX template (PDB: 3O2G) (left) and psBBOX model (right).

## Molecular docking

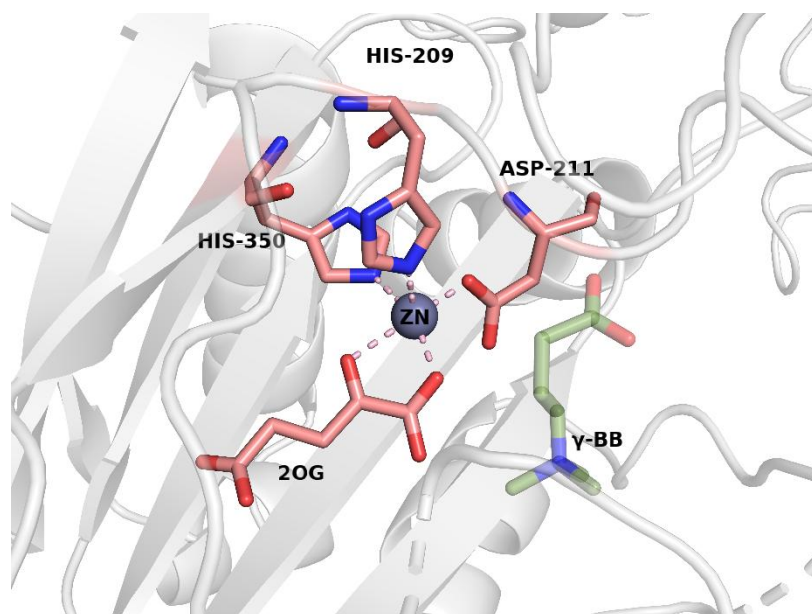

**Figure S4** Catalytic center of psBBOX is composed of His-350, His-209, Asp211 and Metal ion.

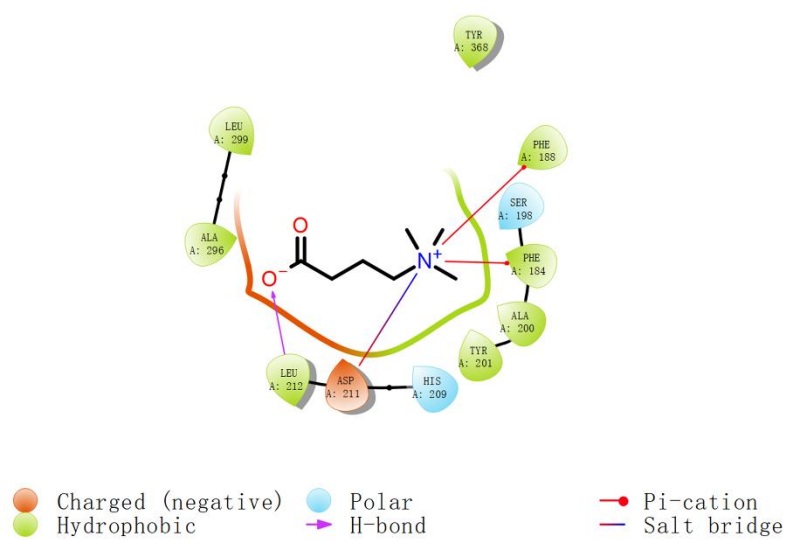

**Figure S5** 2D graphic of interaction between  $\gamma$ -BB and amino acid residues.

## Construction of psBBOX mutants

**Table S1** Primers used in this study

| Primers | Sequence                                  |
|---------|-------------------------------------------|
| 184A-F  | 5'-CGAAAGCAACGCAGGCGTGTGTTGATGTGCG-3'     |
| 184A-R  | 5'-CAGCACGCCTGCGTTGCTTTCGCGAATAAAGC-3'    |
| 188A-F  | 5'-GGCGTGCTGGCAGATGTGCGCAGCAAAGCGG-3'     |
| 188A-R  | 5'-GCGCACATCTGCCAGCACGCCAAAGTTGCTTTCG-3'  |
| 201A-F  | 5'-GATAGCAACGCGGCAACCGCGTTTAACTGCCGCTG-3' |
| 201A-R  | 5'-GTTAAACGCGGTTGCCGCGTTGCTATCCGCATCC-3'  |
| 184Y-F  | 5'-GCAACTATGGCGTGCTGTTGATGTGCG-3'         |
| 184Y-R  | 5'-GCACGCCATAGTTGCTTTCGCGAATAAAGC-3'      |
| 188Y-F  | 5'-CGTGCTGTATGATGTGCGCAGCAAAGCGGATG-3'    |
| 188Y-R  | 5'-GCACATCATAACAGCACGCCAAAGTTGCTTTCG-3'   |
| 201F-F  | 5'-CAACGCGTTTACCGCGTTTAACTGCCGCG-3'       |
| 201F-R  | 5'-GCGGTAAACGCGTTGCTATCCGCATCCG-3'        |
| 368A-F  | 5'-GCTGCGCAGTGGATCGCGATGAACTGC-3'         |
| 368A-R  | 5'-CGATCCACTGCGCAGCCTTAAAAATGGC-3'        |
| 184W-F  | 5'-GCAACTGGGGCGTGCTGTTTGTG-3'             |
| 184W-R  | 5'-CGCCCCAGTTGCTTTCGCGAATAAAG-3'          |
| 188W-F  | 5'-GCTGTGGGATGTGCGCAGCAAAGC-3'            |
| 188W-R  | 5'-CATCCACAGCACGCCAAAGTTGC-3'             |
| 188G-F  | 5'-GCTGGGTGATGTGCGCAGCAAAG-3'             |
| 188G-R  | 5'-CATCACCCAGCACGCCAAAGTTGC-3'            |
| 188V-F  | 5'-GCTGGTTGATGTGCGCAGCAAAG-3'             |
| 188V-R  | 5'-CATCAACCAGCACGCCAAAGTTGC-3'            |

**Table S2** Construction of mutants based on PCR methods

For 184A, 188A, 201A:

| Reaction mixtures (20 $\mu$ L) |                           | PCR conditions      |
|--------------------------------|---------------------------|---------------------|
| 0.6 $\mu$ L                    | template DNA              | 95°C and 3 min,     |
| 1 $\mu$ L                      | forward primer            | 95°C and 30 s       |
| 1 $\mu$ L                      | reverse primer            | 55°C and 30 s       |
| 7.4 $\mu$ L                    | H <sub>2</sub> O          | 72°C and 4 min 30 s |
| 10 $\mu$ L                     | Gloria Nova HS 2 $\times$ | 72°C and 5 min.     |

}  $\times 30$  cycles

For the other mutants:

| Reaction mixtures (20 $\mu$ L) |                           | PCR conditions  |
|--------------------------------|---------------------------|-----------------|
| 0.6 $\mu$ L                    | template DNA              | 95°C and 3 min, |
| 1 $\mu$ L                      | forward primer            | 95°C and 30 s   |
| 1 $\mu$ L                      | reverse primer            | 52°C and 30 s   |
| 7.4 $\mu$ L                    | H <sub>2</sub> O          | 72°C and 4 min  |
| 10 $\mu$ L                     | Gloria Nova HS 2 $\times$ | 72°C and 5 min. |

}  $\times 30$  cycles

## SDS-PAGE analysis of mutants

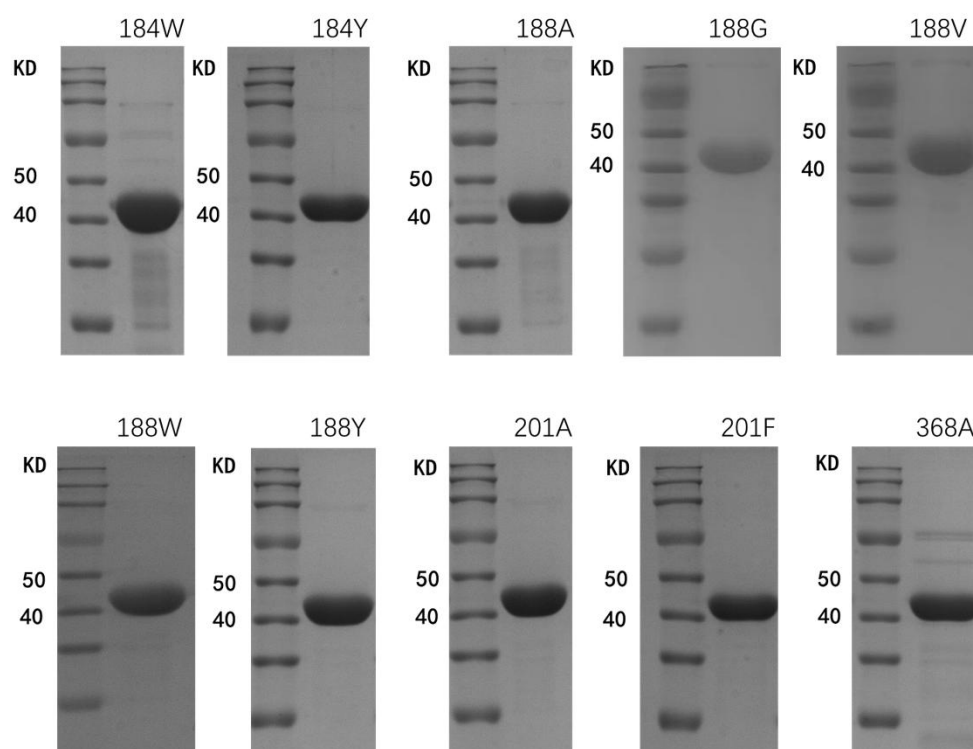

**Figure S6** SDS-PAGE analysis of psBBOX mutants.

## Analysis of psBBOX-188A activity

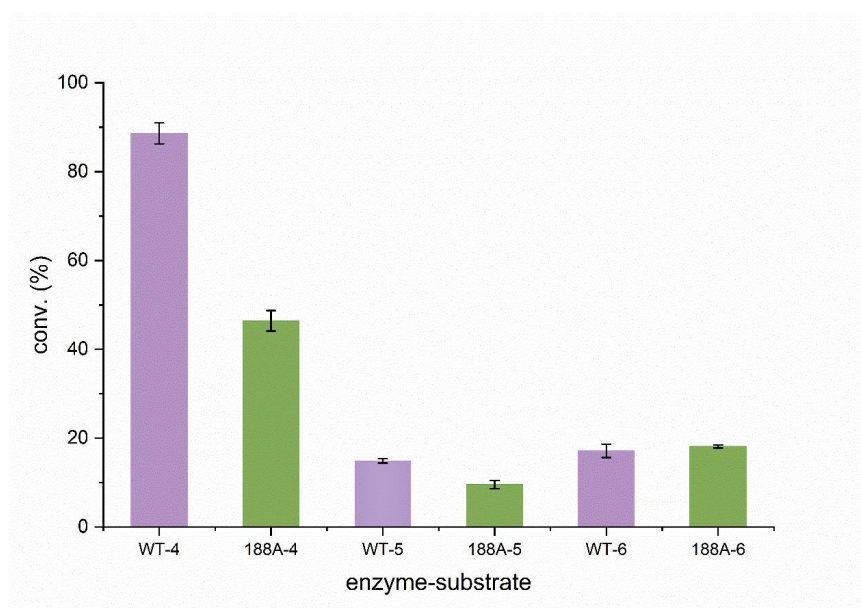

**Figure S7** Comparison of conversion of quaternary ammonium analogs 4-6 catalyzed by WT and 188A.



## kinetic analysis

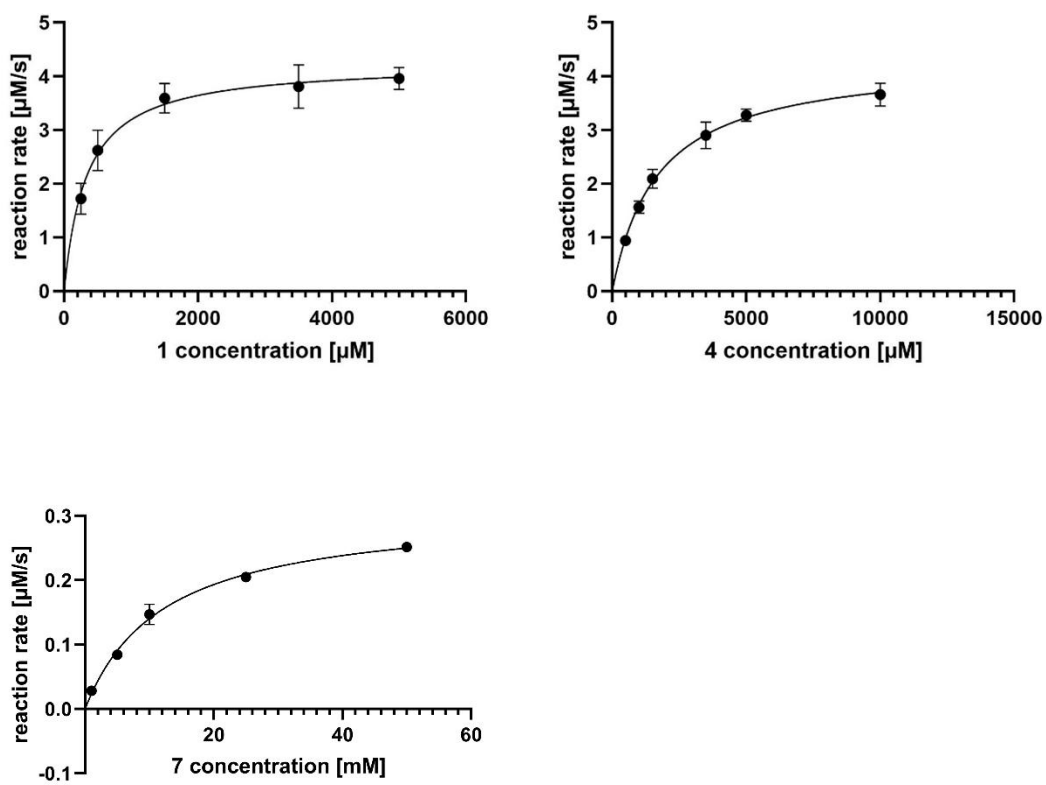

Figure S8 Dependence of reaction rates on  $\gamma$ -BB, 4 and 7 concentration for wt-psBBOX.

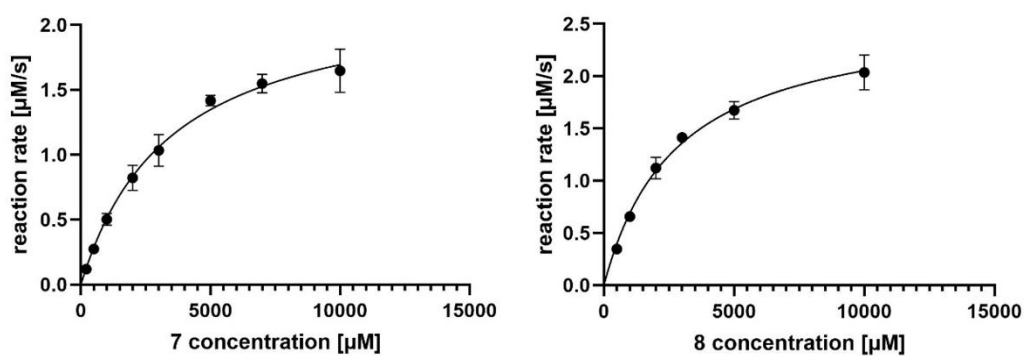

Figure S9 Dependence of reaction rates on 7 and 8 concentration for 188A mutant.

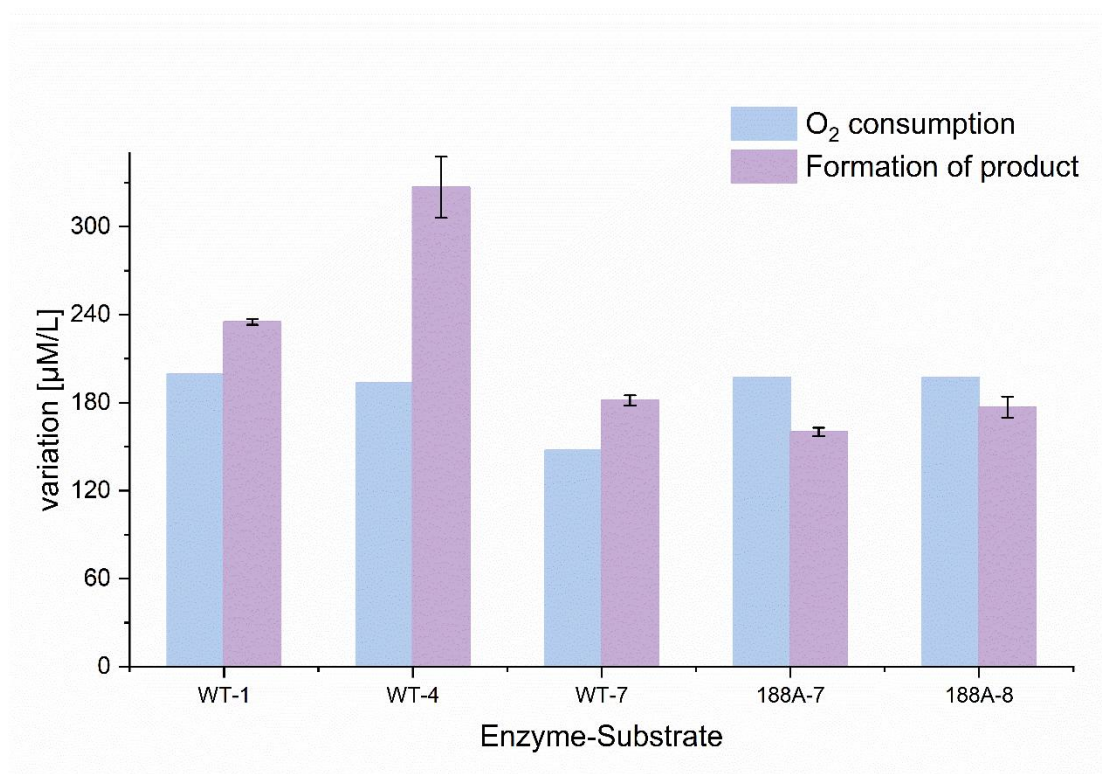

**Figure S10** Ratio of oxygen consumption to product formation.

## Synthesis of $\gamma$ -BB analogues

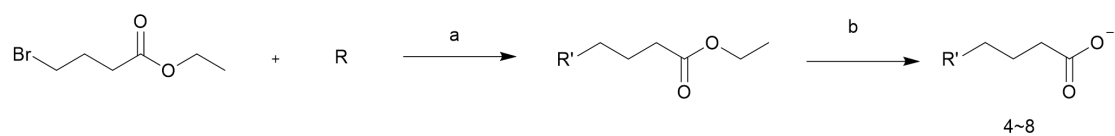

| No. | R | R' |
|-----|---|----|
| 4   |   |    |
| 5   |   |    |
| 6   |   |    |
| 7   |   |    |
| 8   |   |    |

**Figure S11** Synthetic routes of quaternary ammonium analogues 4~8.

### Procedure a<sup>2</sup>

Ethyl 4-bromobutyrate (1.2equiv.); tertiary amine (1.0equiv. For (4), N,N-Dimethylethylamine; for(5), N,N-Dimethylisopropylamine; for (6), N,N-Diethylmethanamine; for (7), 1-Methylpyrrolidine; for (8), N-Methylpiperidine.) and acetone (10ml) was added to round-bottom flask, room temperature stirred for 12h. Solvents were evaporated in vacuo. Without purification, it can be directly used in the next reaction.

### Procedure b<sup>2</sup>

3M hydrochloric acid was added until pH1, overnight at room temperature, the product was purified by cationic exchange resin.

**Stereoselective synthesis of two configurations of 4a, 7a, 8a.**

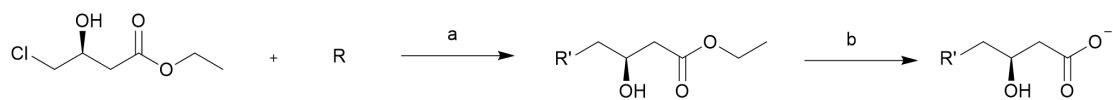

| No.  | R | R' |
|------|---|----|
| 4a-S |   |    |
| 7a-S |   |    |
| 8a-S |   |    |

**Figure S12** Synthetic routes of 4a-S, 7a-S, 8a-S.

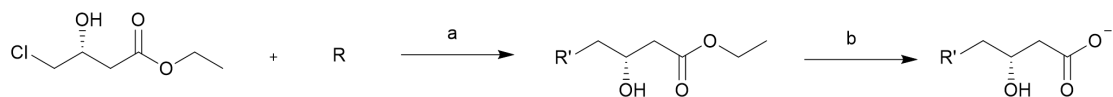

| No.  | R | R' |
|------|---|----|
| 4a-R |   |    |
| 7a-R |   |    |
| 8a-R |   |    |

**Figure S13** Synthetic routes of 4a-R, 7a-R, 8a-R.

**Procedure a<sup>3</sup>:** Adding 193mg sodium hydroxide into 3.5ml water, stir to dissolve it, cool down in the ice bath, add 2.5mmol corresponding tertiary amine and 3mmol Ethyl (R)-(+)-4-chloro-3-hydroxybutyrate or Ethyl (S)-4-chloro-3-hydroxybutyrate successively, react in the ice bath for 1h, and temperature rise to room temperature for 12h.

**Procedure b<sup>3</sup>:** Adding 3M hydrochloric acid to pH 6, purification using cationic resin.

## NMR spectra

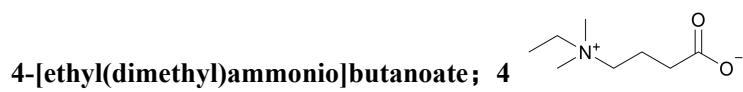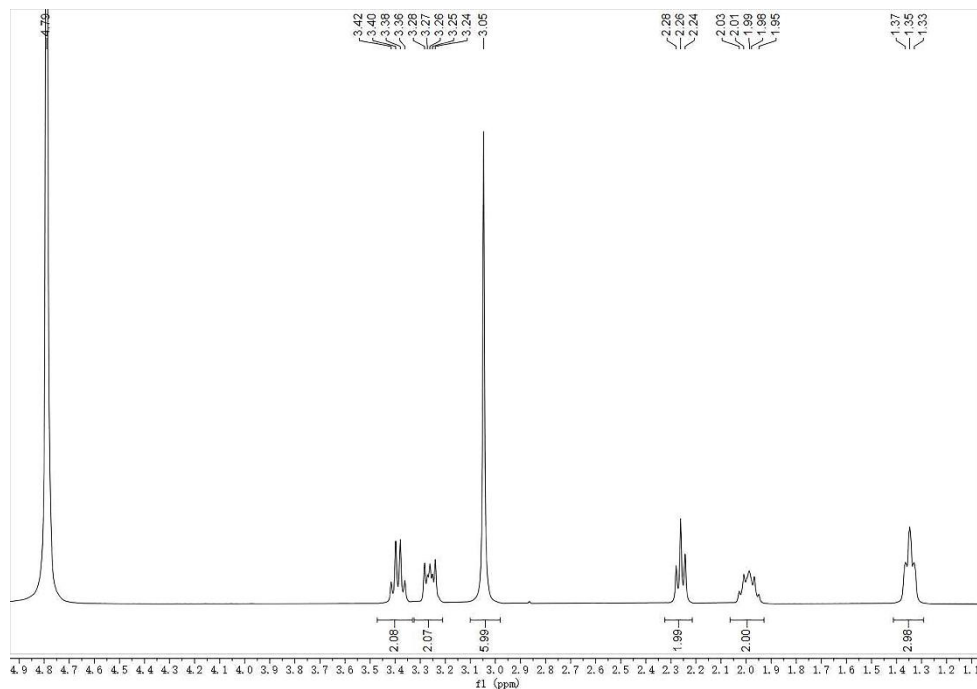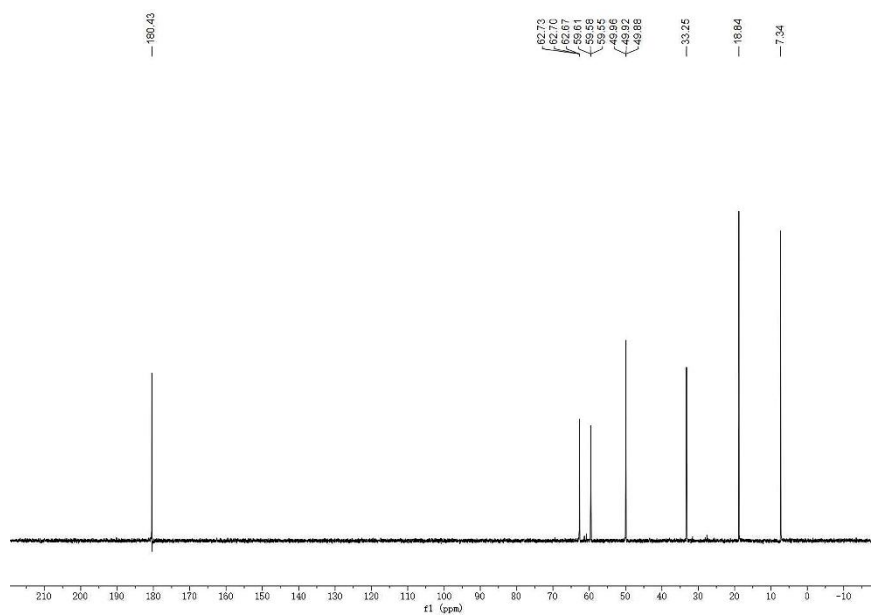

4-[isopropyl(dimethyl)ammonio]butanoate; **5**

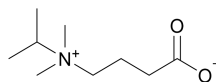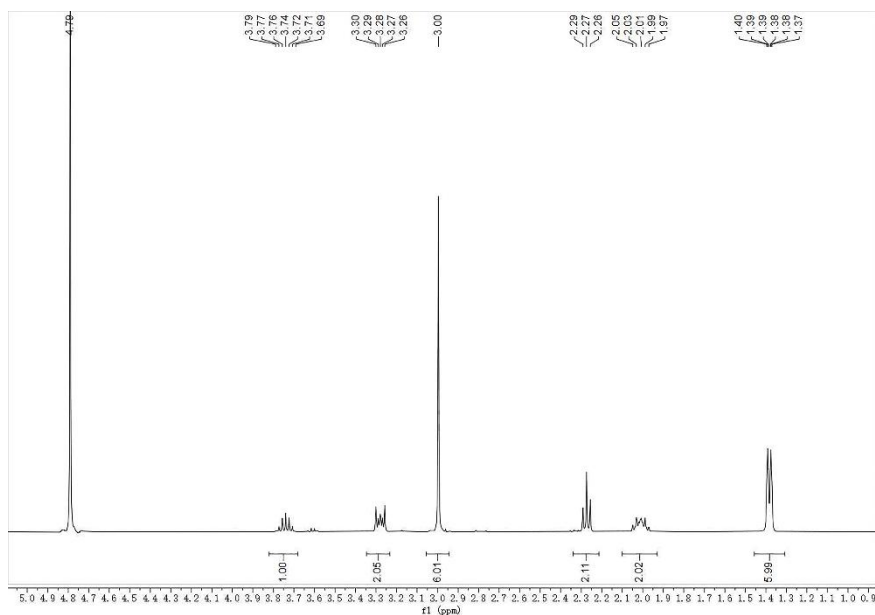

Figure S16 <sup>1</sup>H NMR spectra of **5**.

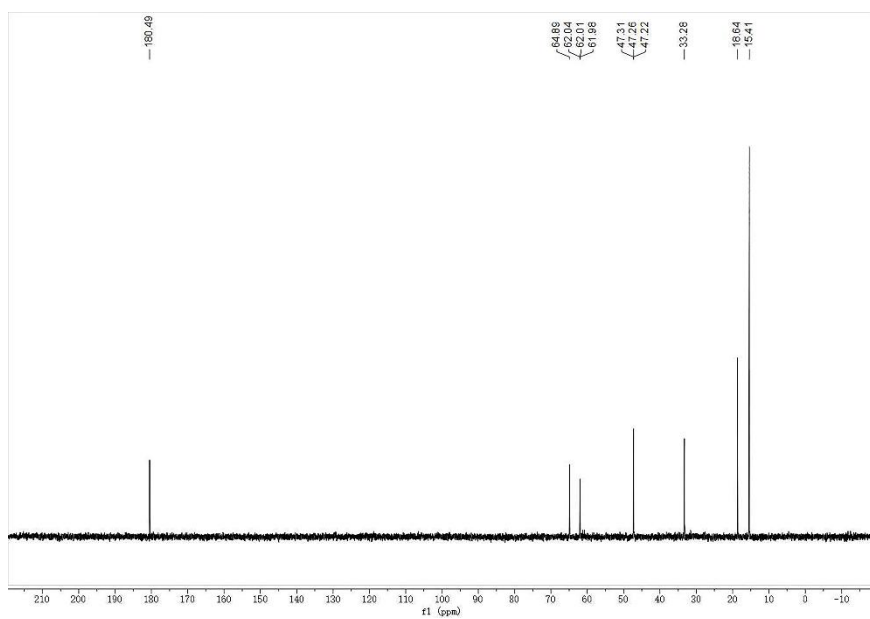

Figure S17 <sup>13</sup>C NMR spectra of **5**.

4-[diethyl(methyl)ammonio]butanoate; **6**

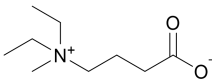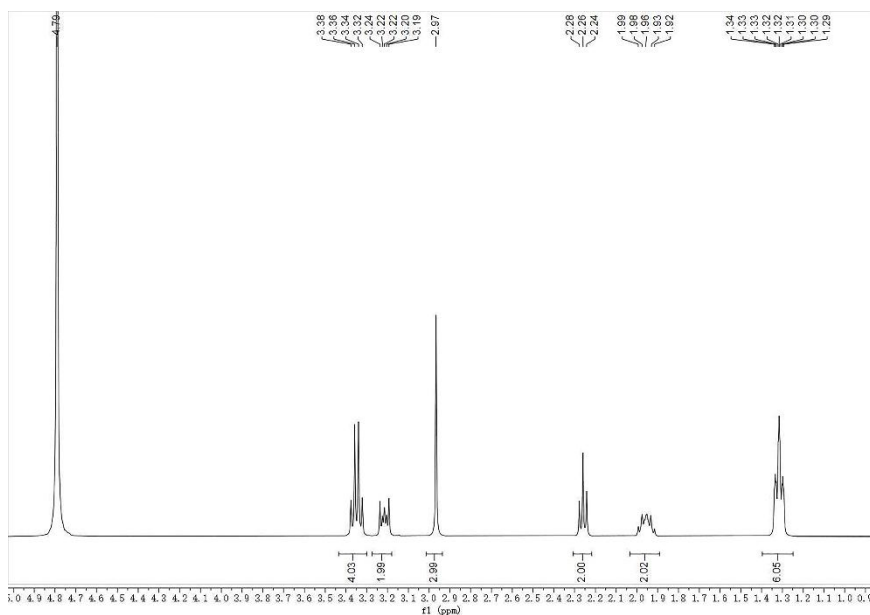

Figure S18 <sup>1</sup>H NMR spectra of **6**.

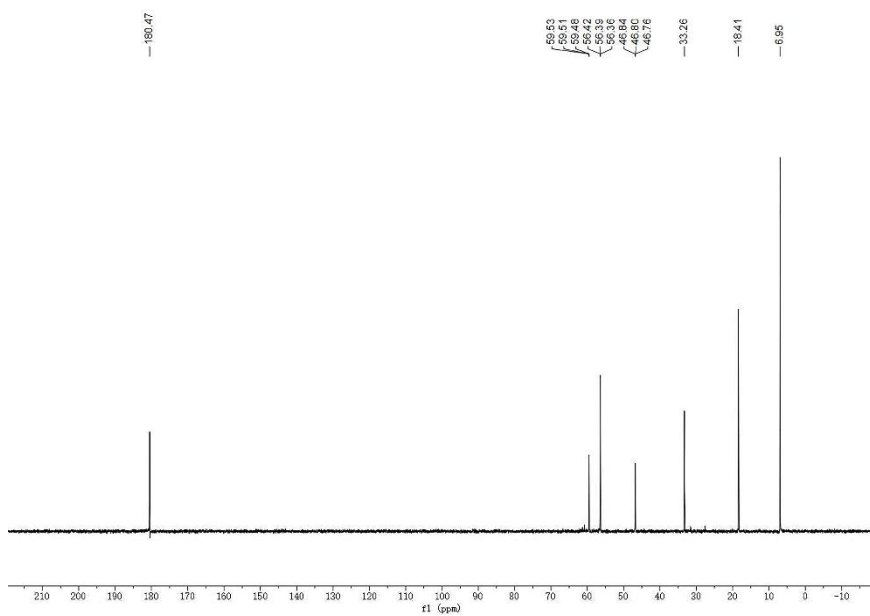

Figure S19 <sup>13</sup>C NMR spectra of **6**.

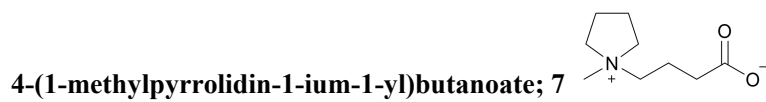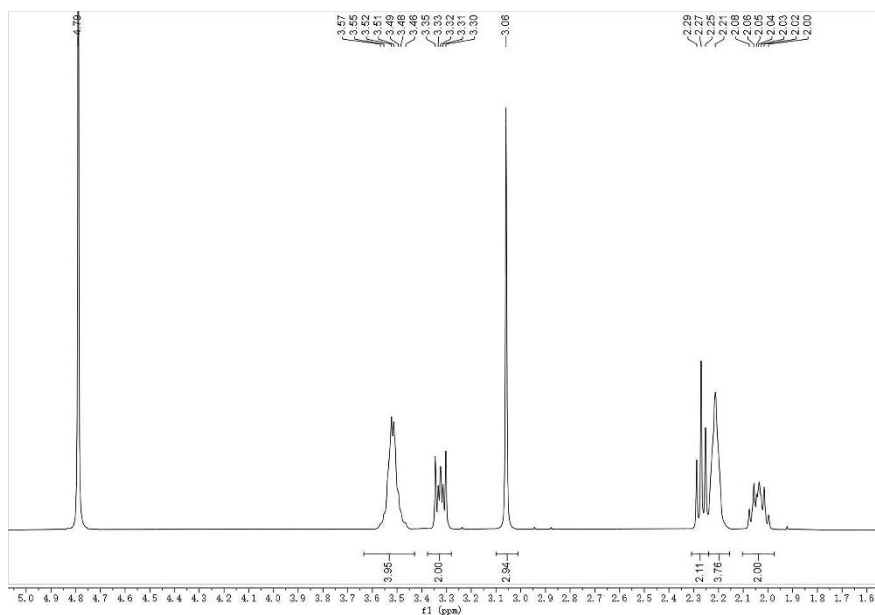

Figure S20 <sup>1</sup>H NMR spectra of **7**.

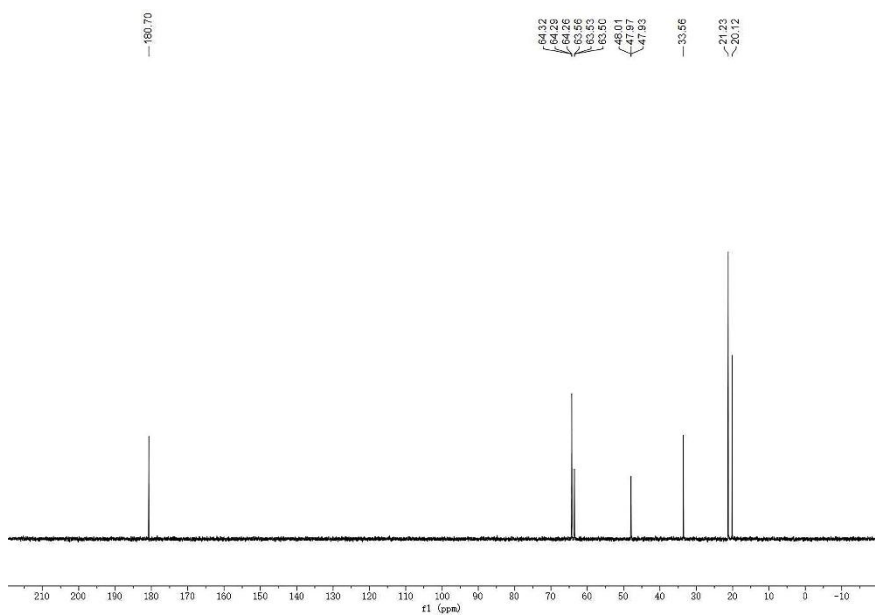

Figure S21 <sup>13</sup>C NMR spectra of **7**.



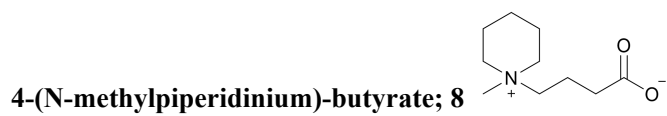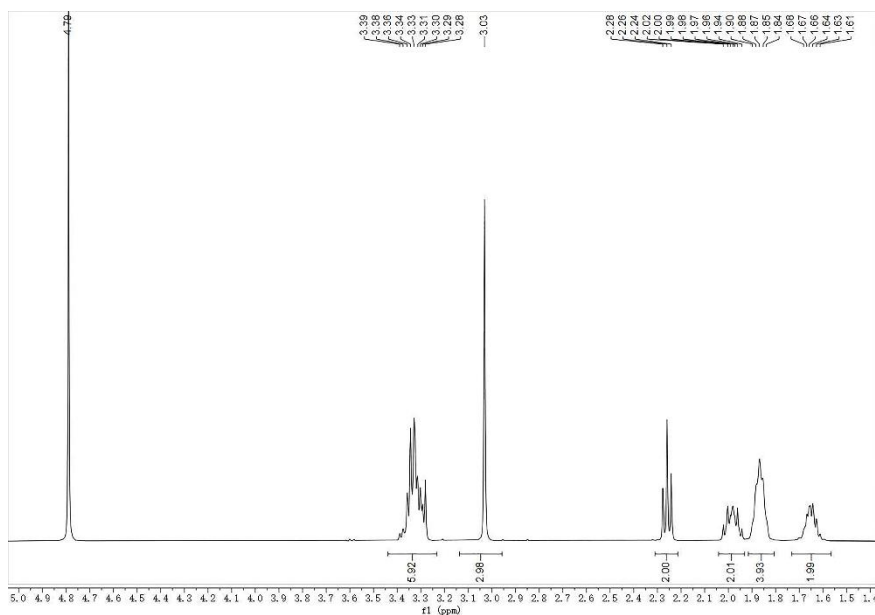

**Figure S22**  $^1\text{H}$ NMR spectra of 8.

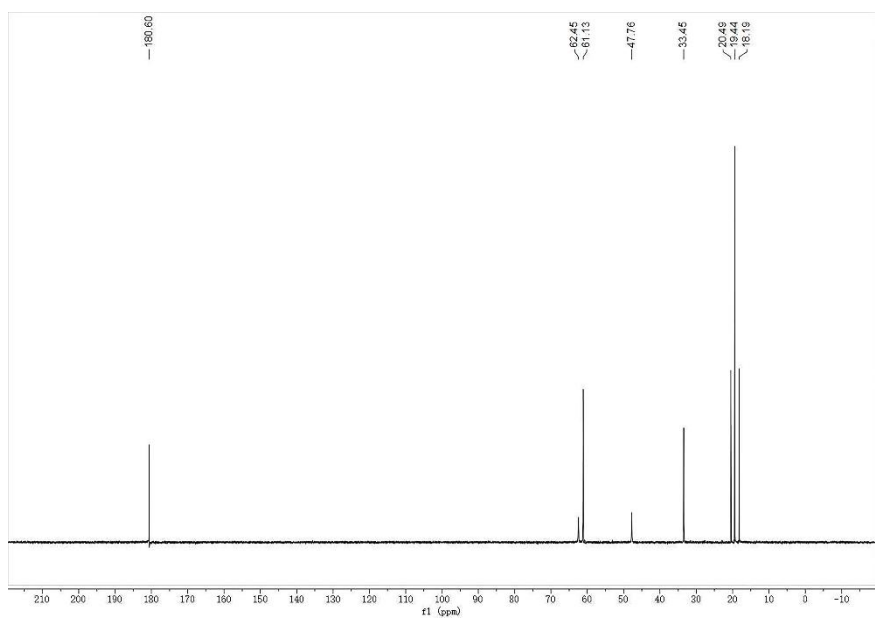

**Figure S23**  $^{13}\text{C}$ NMR spectra of 8.

4-(ethyltrimethylammonio)-3-hydroxybutanoate; 4a

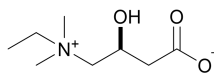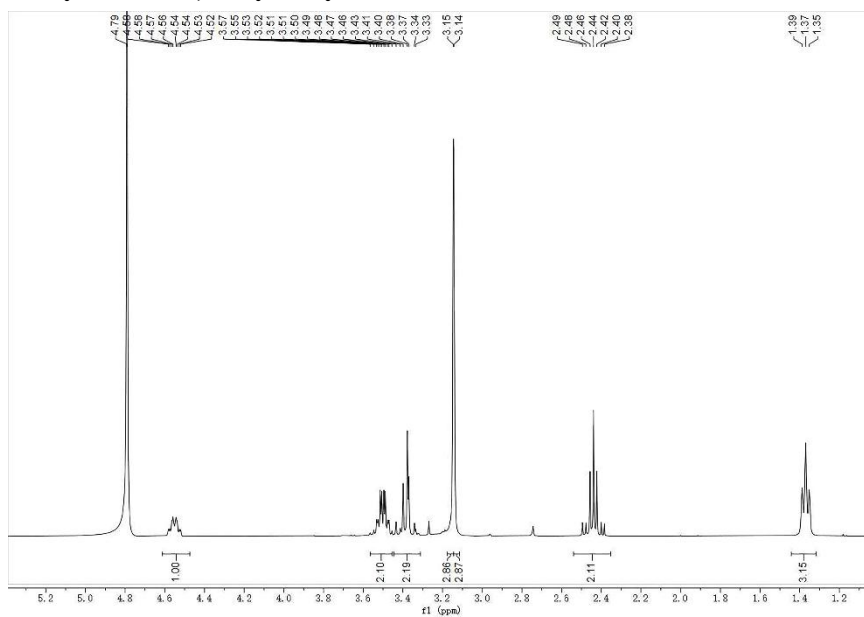

Figure S24 <sup>1</sup>H NMR spectra of 4a.

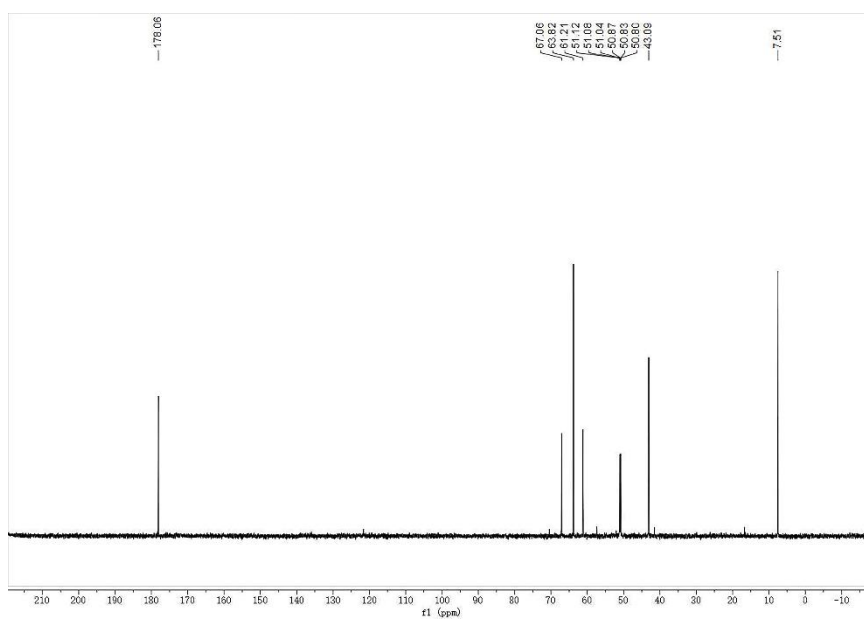

Figure S25 <sup>13</sup>C NMR spectra of 4a.

3-hydroxy-4-(1-methylpyrrolidin-1-ium-1-yl)butanoate; 7a

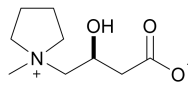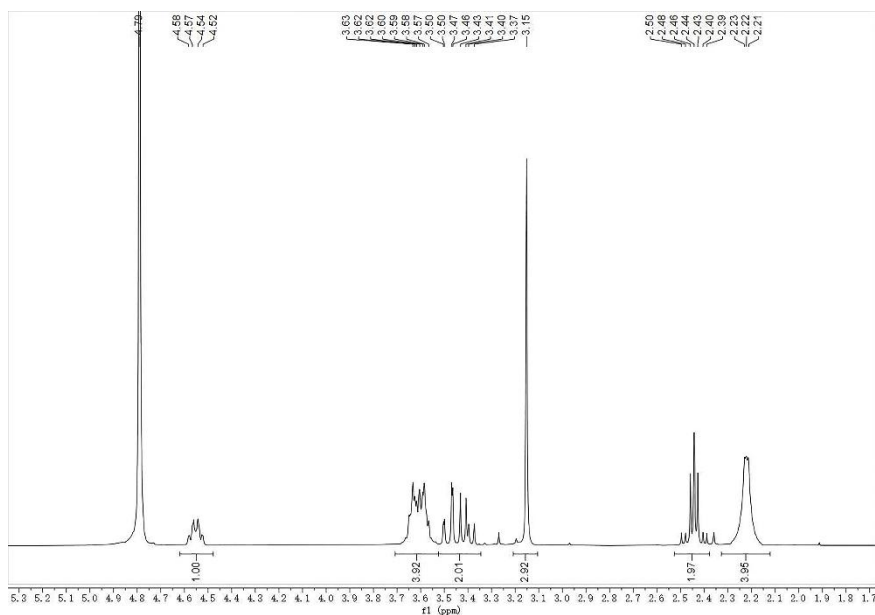

Figure S26 <sup>1</sup>H NMR spectra of 7a.

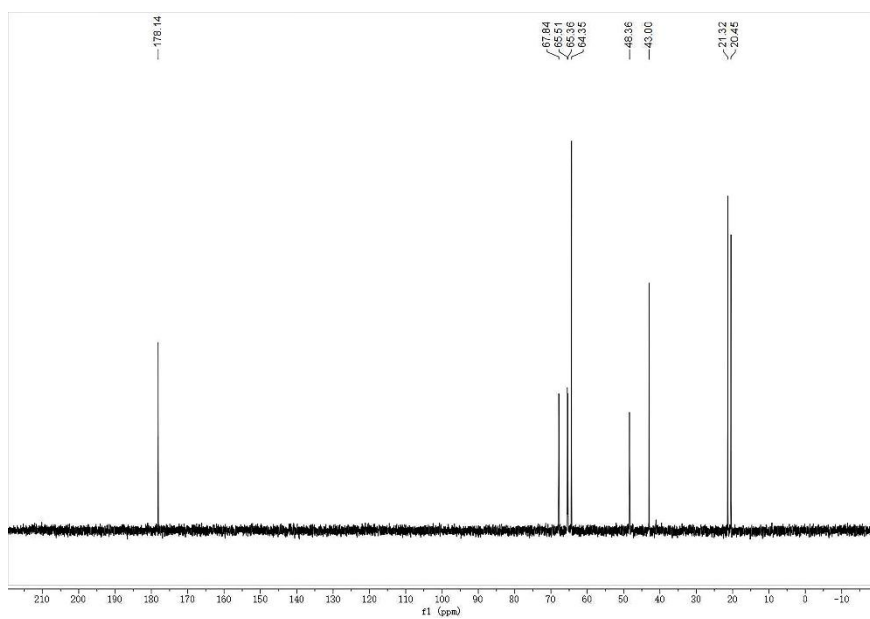

Figure S27 <sup>13</sup>C NMR spectra of 7a.

**3-hydroxy-4-(1-methylpiperidin-1-ium-1-yl)butanoate; 8a**

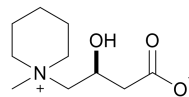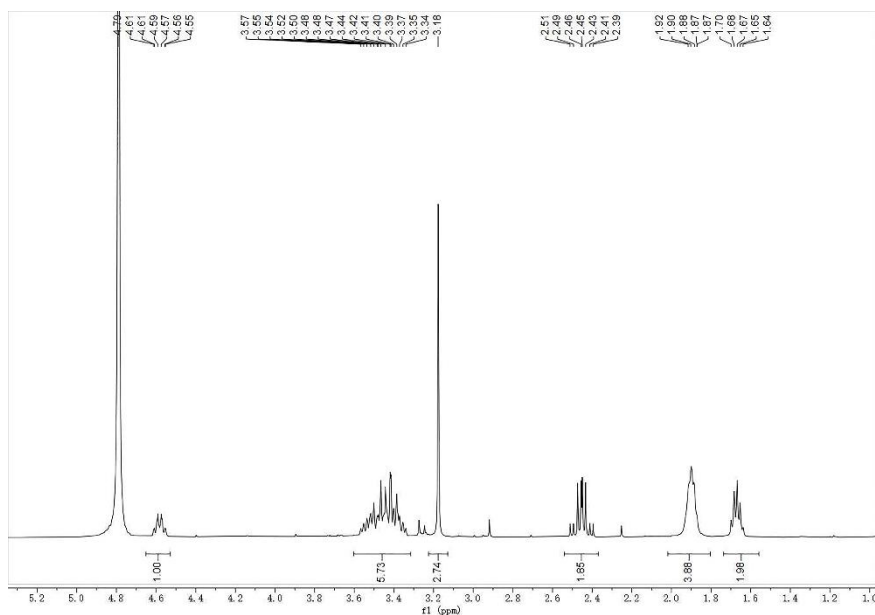

**Figure S28** <sup>1</sup>H NMR spectra of 8a.

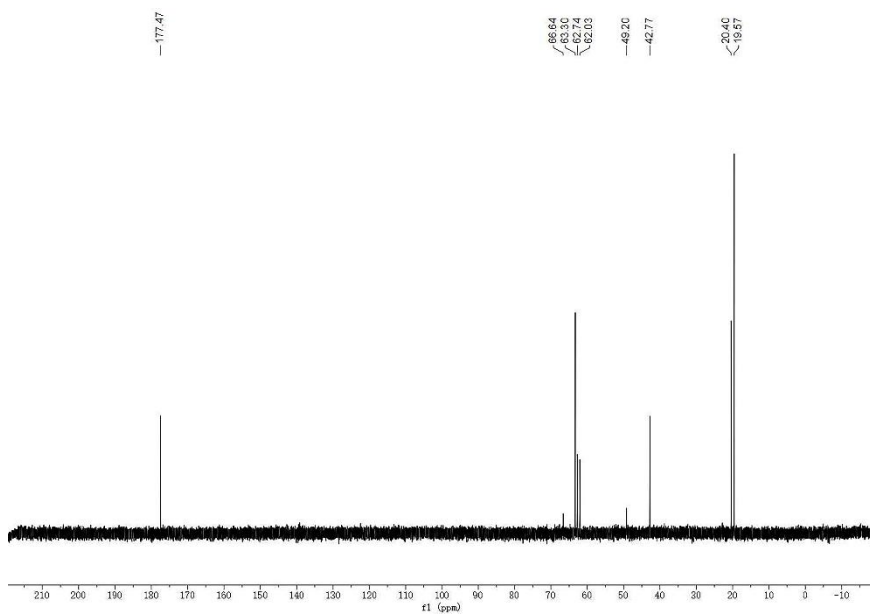

**Figure S29** <sup>13</sup>C NMR spectra of 8a.

**(R)-4-(ethylidimethylammonio)-3-hydroxybutanoate; 4a-R**

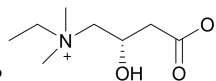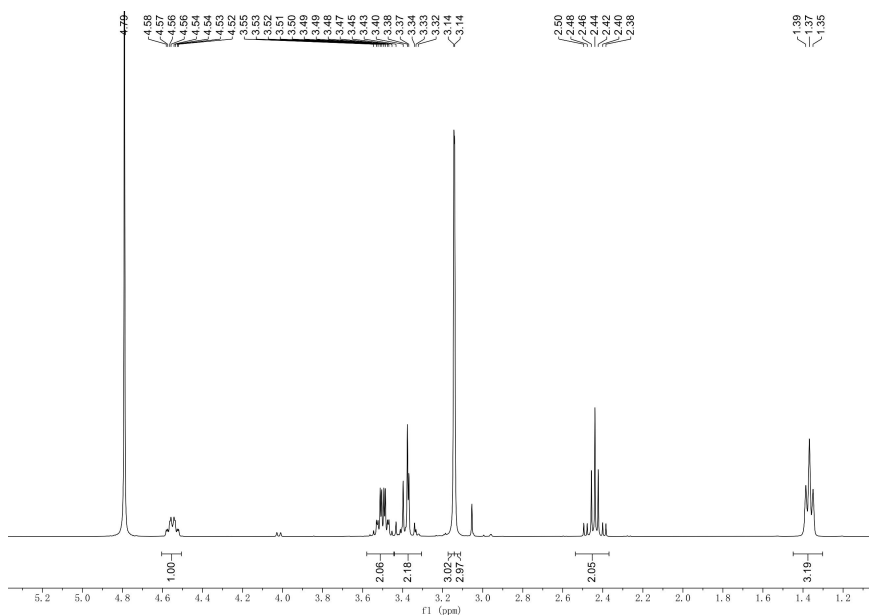

**Figure S30 <sup>1</sup>H NMR spectra of 4a-R.**

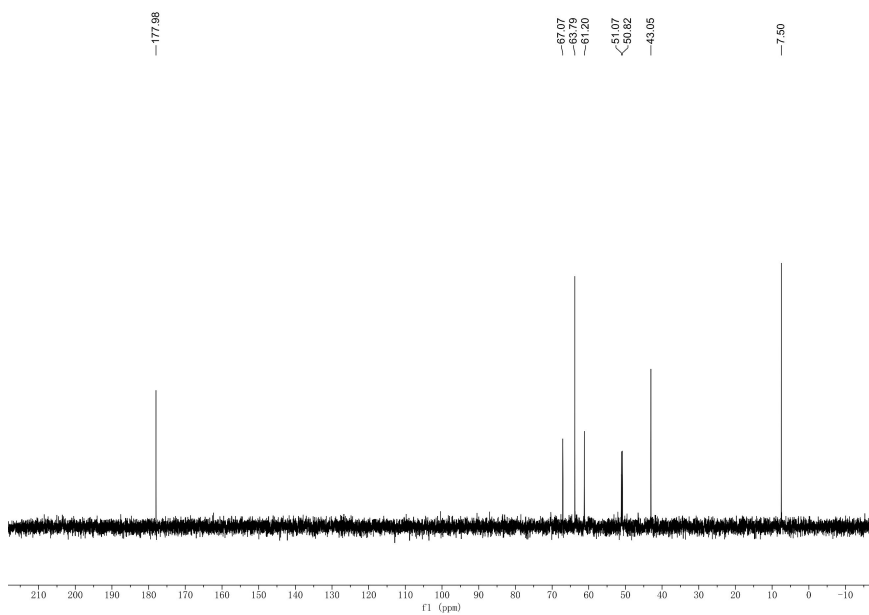

**Figure S31 <sup>13</sup>C NMR spectra of 4a-R.**

(S)-4-(ethyldimethylammonio)-3-hydroxybutanoate; 4a-S

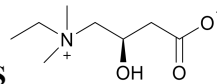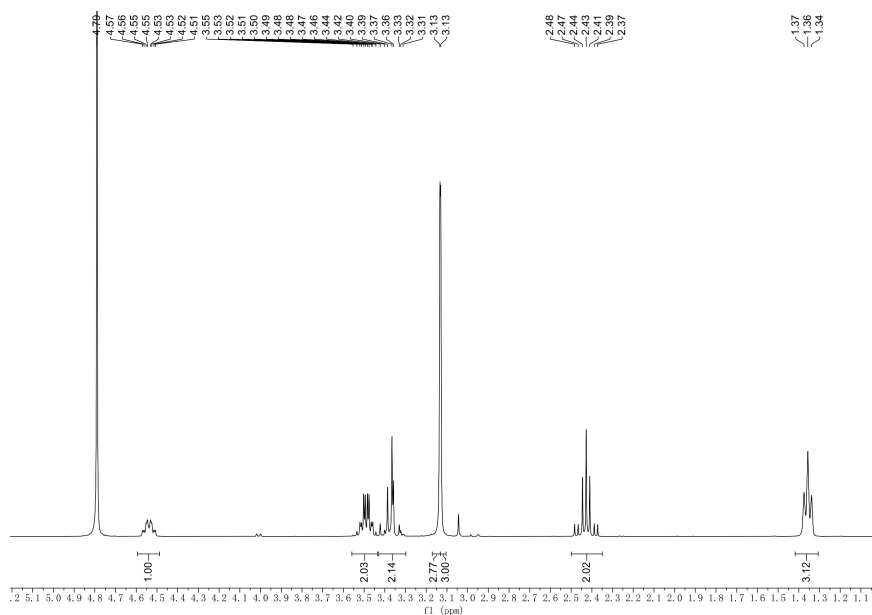

Figure S32 <sup>1</sup>H NMR spectra of 4a-S.

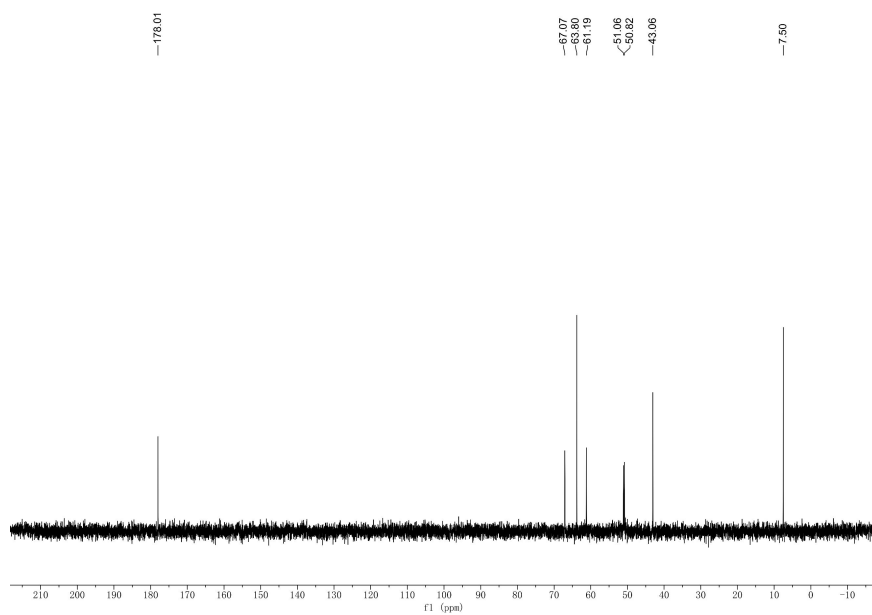

Figure S33 <sup>13</sup>C NMR spectra of 4a-S.

(R)-3-hydroxy-4-(1-methylpyrrolidin-1-ium-1-yl)butanoate; 7a-R

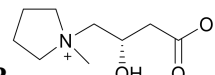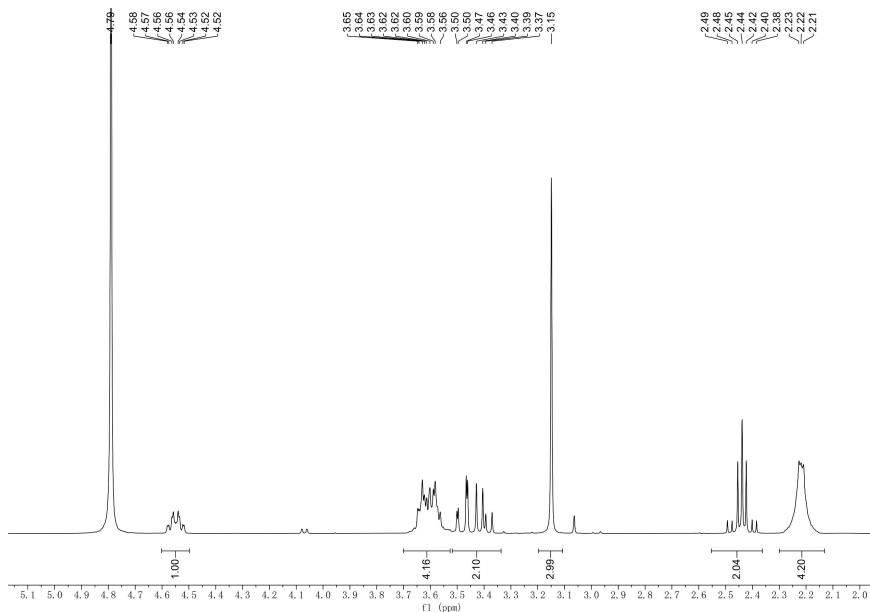

Figure S34 <sup>1</sup>H NMR spectra of 7a-R.

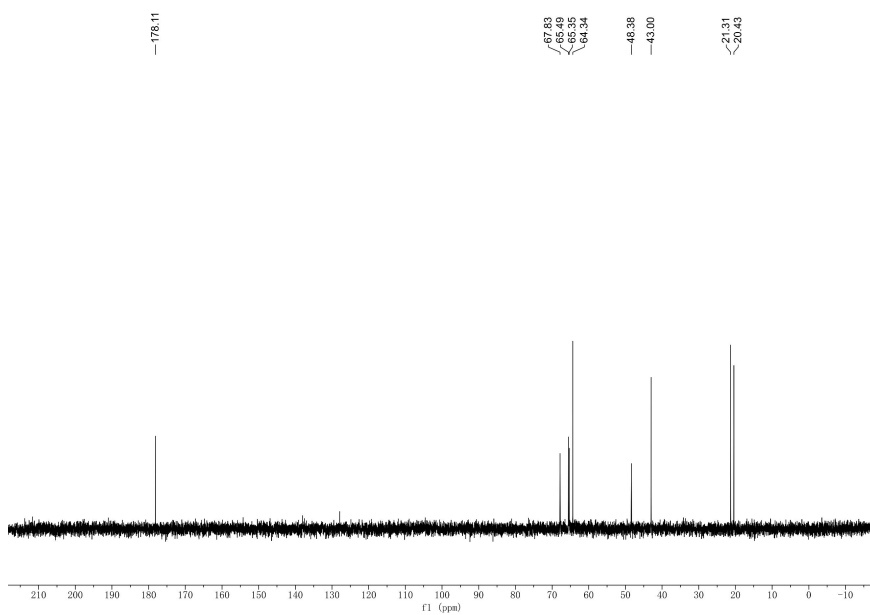

Figure S35 <sup>13</sup>C NMR spectra of 7a-R.

(S)-3-hydroxy-4-(1-methylpyrrolidin-1-ium-1-yl)butanoate; 7a-S

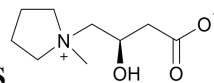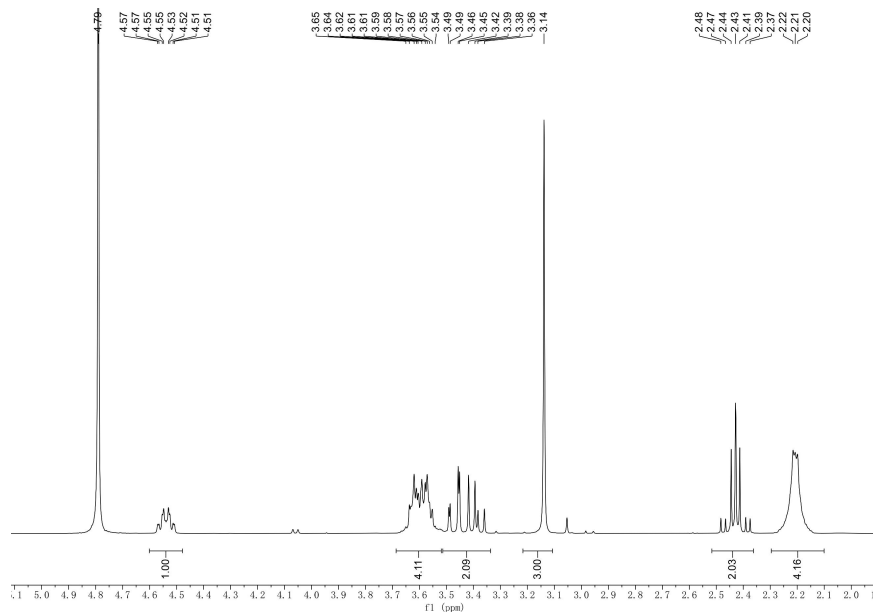

Figure S36 <sup>1</sup>H NMR spectra of 7a-S.

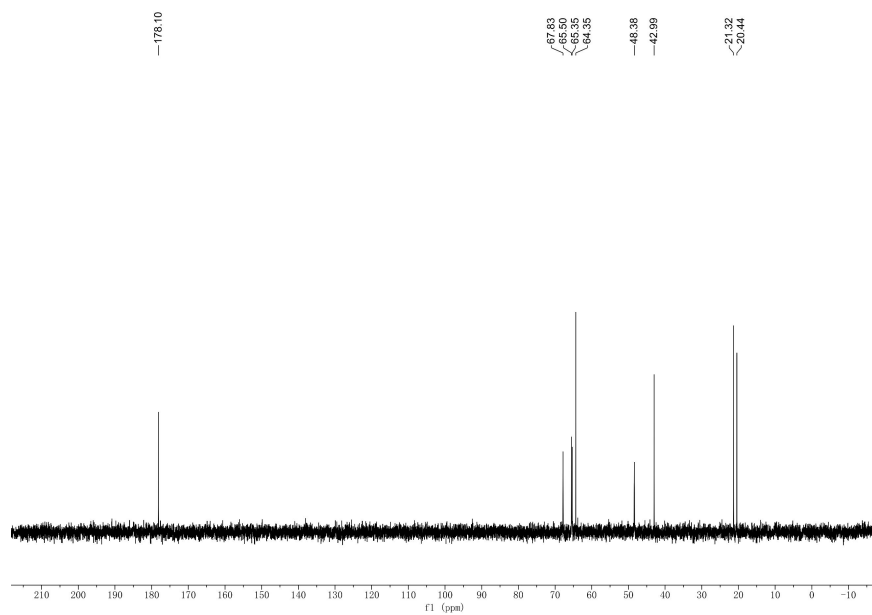

Figure S37 <sup>13</sup>C NMR spectra of 7a-S.



**(R)-3-hydroxy-4-(1-methylpiperidin-1-ium-1-yl)butanoate; 8a-R**

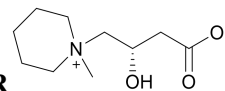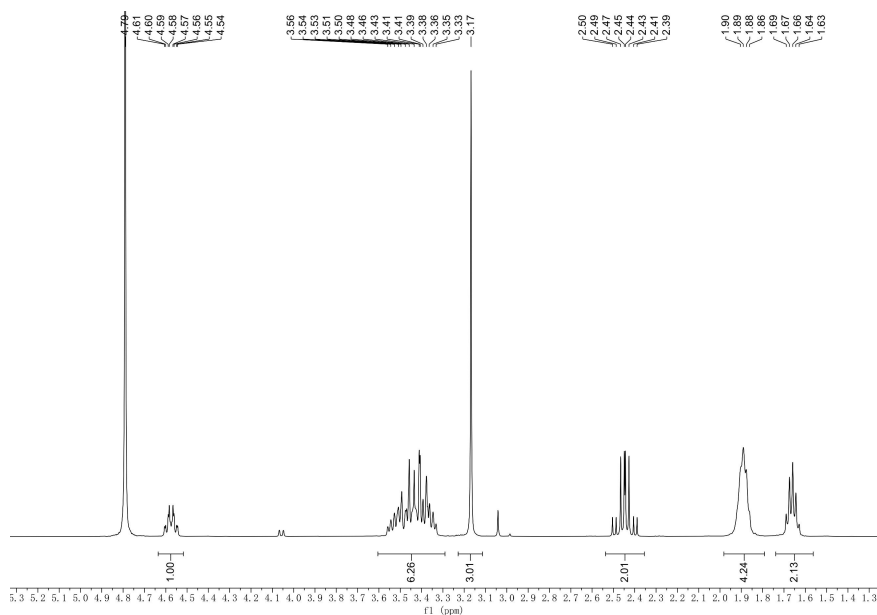

**Figure S38** <sup>1</sup>H NMR spectra of 8a-R.

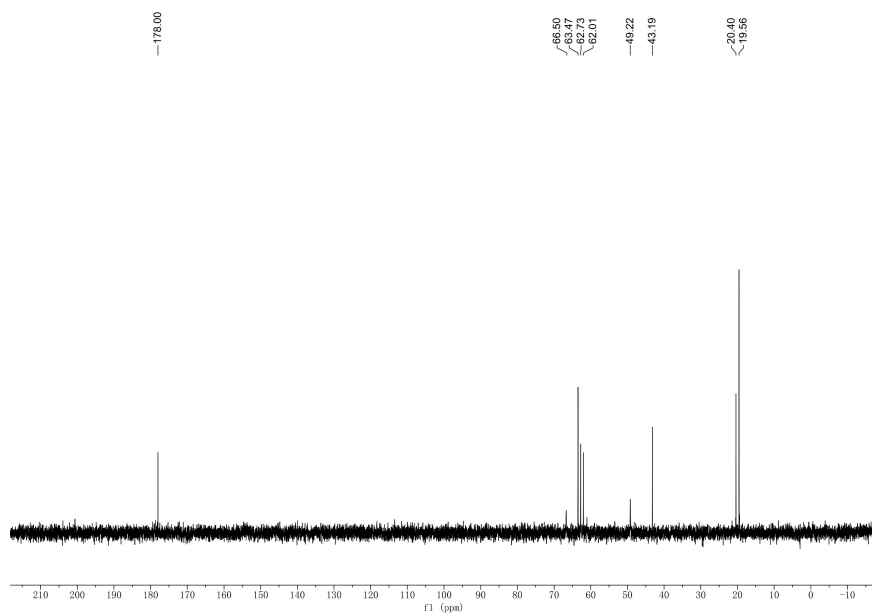

**Figure S39** <sup>13</sup>C NMR spectra of 8a-R.

**(S)-3-hydroxy-4-(1-methylpiperidin-1-ium-1-yl)butanoate; 8a-S**

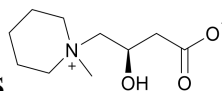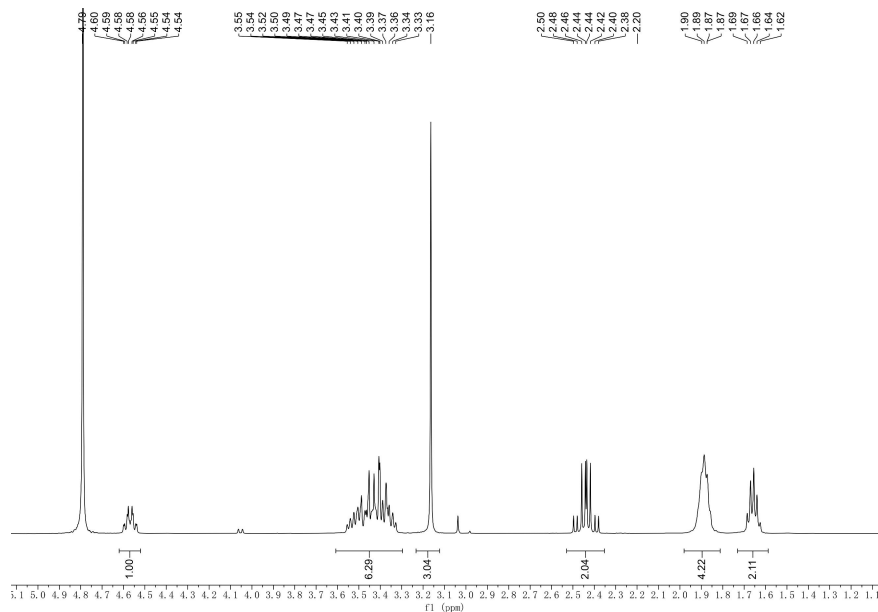

**Figure S40** <sup>1</sup>H NMR spectra of 8a-S.

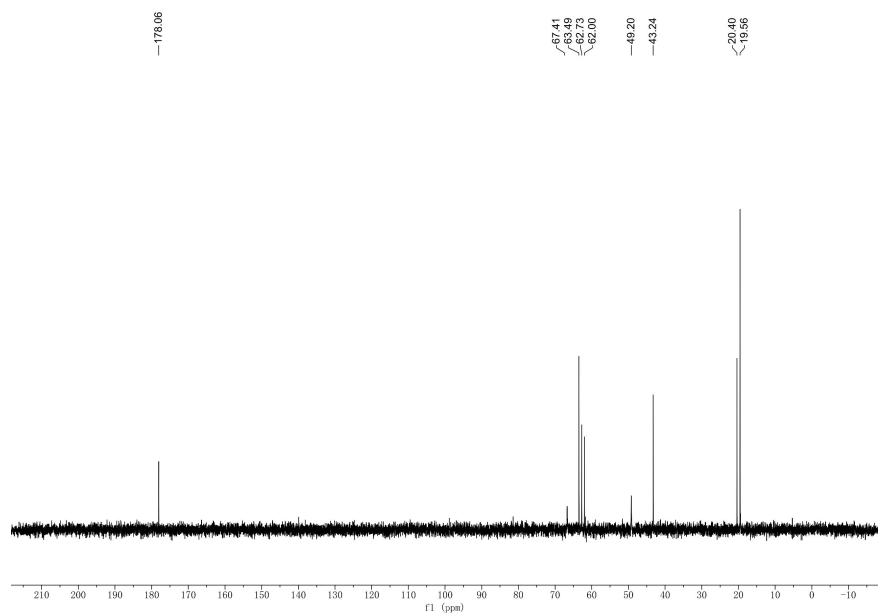

**Figure S41** <sup>13</sup>C NMR spectra of 8a-S.

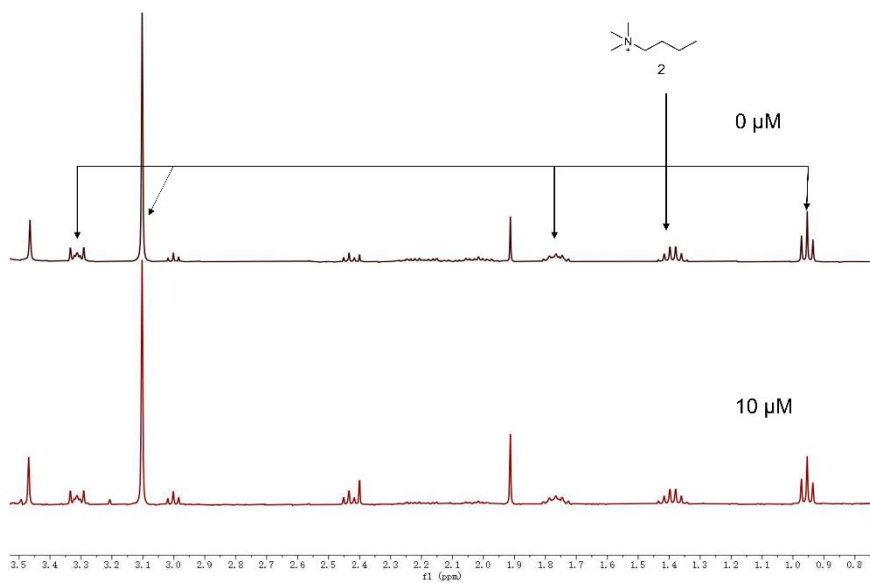

**Figure S42**  $^1\text{H}$  NMR monitoring of the 2 hydroxylation by psBBOX.

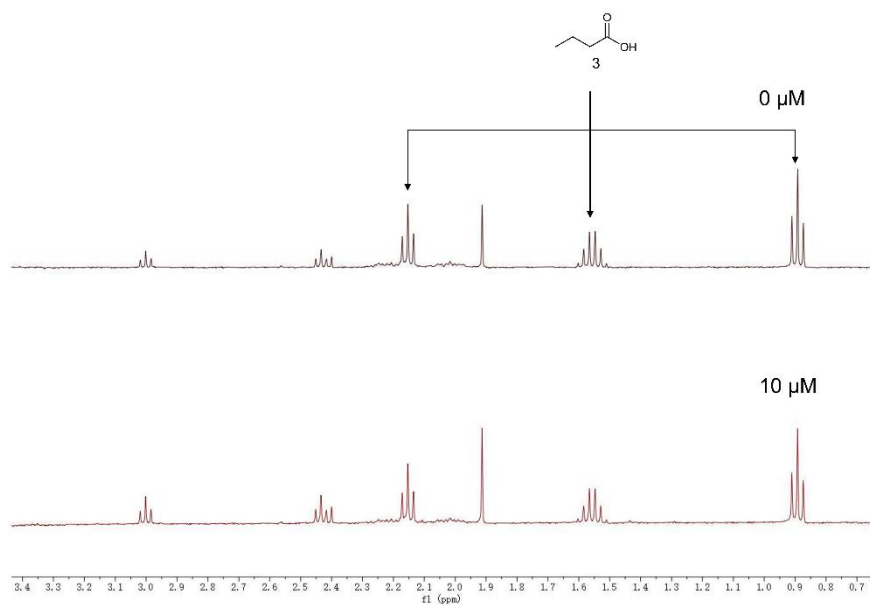

**Figure S43**  $^1\text{H}$  NMR monitoring of the 2 hydroxylation by psBBOX.

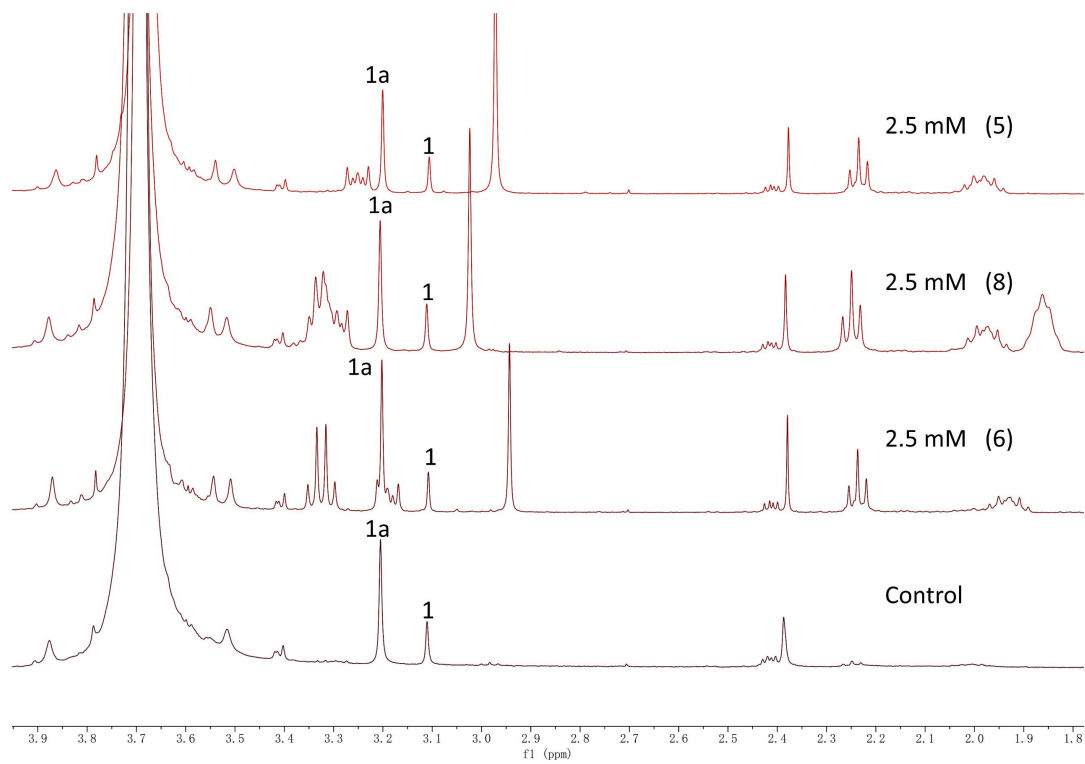

**Figure S44** The inhibitory effect of (5), (6), (8) on the transformation of original substrate (1).

## References

1. Robert, X.; Gouet, P., Deciphering key features in protein structures with the new ENDscript server. *Nucleic acids research* **2014**, *42* (W1), W320-W324.
2. Ryzik, A. M.; Chowdhury, R.; Kochan, G. T.; Williams, S. T.; McDonough, M. A.; Kawamura, A.; Schofield, C. J., Modulating carnitine levels by targeting its biosynthesis – selective inhibition of  $\gamma$ -butyrobetaine hydroxylase. *Chemical Science* **2014**, *5* (5), 1765–1771.
3. 吴静; 刘九知; 白洁; 孙德夫 一种左卡尼汀化合物的制备方法. CN104030934B, 2016-06-15.
